# Supplementary material for: Infrared spectrum and intermolecular potential energy surface of the CO–O2 dimer
Source: Royal Society of Chemistry journal article supplement (doi:10.1039/c8cp02282h), 2018-01-01
Supplement: c8cp02282h1.pdf [file c8cp02282h1.pdf]

Appendix to:

**Infrared spectrum and intermolecular potential energy surface of the CO – O<sub>2</sub> dimer**

A.J. Barclay, A.R.W. McKellar, N. Moazzen-Ahmadi, Richard Dawes, Xiao-Gang Wang, and Tucker Carrington Jr.

Table A-1. Observed transitions of CO-O<sub>2</sub> in group 1, correlating with ( $n(\text{O}_2) = 1, j(\text{O}_2) = 0$ ) (units of cm<sup>-1</sup>). Note: The "calculated" positions correspond to the "experimental" energy levels from Table 1 of the paper.

| Upper<br><i>J, K<sub>eff</sub></i> | Lower<br><i>J, K<sub>eff</sub></i> | Observed | Calculated | Obs - Calc |
|------------------------------------|------------------------------------|----------|------------|------------|
| 1,1f                               | 1,0                                | 2145.411 | 2145.411   | 0.0000     |
| 2,1f                               | 2,0                                | 2145.427 | 2145.427   | 0.0000     |
| 3,1f                               | 3,0                                | 2145.451 | 2145.451   | 0.0000     |
| 4,1f                               | 4,0                                | 2145.480 | 2145.480   | 0.0000     |
| 5,1f                               | 5,0                                | 2145.516 | 2145.516   | 0.0000     |
| 6,1f                               | 6,0                                | 2145.555 | 2145.555   | 0.0000     |
| 7,1f                               | 7,0                                | 2145.593 | 2145.593   | 0.0000     |
| 8,1f                               | 8,0                                | 2145.628 | 2145.628   | 0.0000     |
| 1,1e                               | 0,0                                | 2145.557 | 2145.557   | -0.0001    |
| 2,1e                               | 1,0                                | 2145.712 | 2145.712   | 0.0000     |
| 3,1e                               | 2,0                                | 2145.862 | 2145.862   | 0.0000     |
| 4,1e                               | 3,0                                | 2146.008 | 2146.008   | -0.0001    |
| 5,1e                               | 4,0                                | 2146.147 | 2146.147   | -0.0001    |
| 6,1e                               | 5,0                                | 2146.278 | 2146.278   | 0.0000     |
| 7,1e                               | 6,0                                | 2146.402 | 2146.402   | 0.0000     |
| 8,1e                               | 7,0                                | 2146.519 | 2146.519   | 0.0000     |
| 1,1e                               | 2,0                                | 2145.094 | 2145.094   | 0.0001     |
| 2,1e                               | 3,0                                | 2144.942 | 2144.942   | 0.0000     |
| 3,1e                               | 4,0                                | 2144.789 | 2144.789   | 0.0000     |
| 4,1e                               | 5,0                                | 2144.635 | 2144.635   | 0.0001     |
| 5,1e                               | 6,0                                | 2144.478 | 2144.478   | 0.0001     |
| 6,1e                               | 7,0                                | 2144.318 | 2144.318   | -0.0001    |
| 7,1e                               | 8,0                                | 2144.157 | 2144.158   | -0.0003    |
|                                    |                                    |          |            |            |
| 1,0                                | 0,0                                | 2142.849 | 2142.849   | 0.0001     |
| 2,0                                | 1,0                                | 2143.003 | 2143.003   | 0.0001     |
| 3,0                                | 2,0                                | 2143.156 | 2143.156   | 0.0000     |
| 4,0                                | 3,0                                | 2143.308 | 2143.307   | 0.0001     |
| 5,0                                | 4,0                                | 2143.457 | 2143.457   | 0.0000     |
| 6,0                                | 5,0                                | 2143.603 | 2143.603   | 0.0000     |
| 7,0                                | 6,0                                | 2143.748 | 2143.748   | 0.0000     |
| 8,0                                | 8,1f                               | 2139.758 | 2139.758   | 0.0000     |

|      |      |          |          |         |
|------|------|----------|----------|---------|
| 0,0  | 1,0  | 2142.540 | 2142.540 | -0.0001 |
| 1,0  | 2,0  | 2142.386 | 2142.386 | -0.0002 |
| 2,0  | 3,0  | 2142.234 | 2142.234 | 0.0000  |
| 3,0  | 4,0  | 2142.083 | 2142.083 | 0.0002  |
| 4,0  | 5,0  | 2141.934 | 2141.934 | -0.0001 |
| 5,0  | 6,0  | 2141.787 | 2141.787 | -0.0001 |
| 6,0  | 7,0  | 2141.643 | 2141.643 | 0.0000  |
|      |      |          |          |         |
| 1,0  | 1,1f | 2139.948 | 2139.948 | 0.0000  |
| 2,0  | 2,1f | 2139.933 | 2139.933 | 0.0000  |
| 3,0  | 3,1f | 2139.911 | 2139.911 | 0.0000  |
| 4,0  | 4,1f | 2139.884 | 2139.884 | 0.0000  |
| 5,0  | 5,1f | 2139.853 | 2139.853 | 0.0000  |
| 6,0  | 6,1f | 2139.819 | 2139.819 | 0.0000  |
| 7,0  | 7,1f | 2139.787 | 2139.787 | 0.0000  |
| 8,0  | 8,1f | 2139.758 | 2139.758 | 0.0000  |
| 0,0  | 1,1e | 2139.800 | 2139.800 | 0.0001  |
| 1,0  | 2,1e | 2139.645 | 2139.645 | 0.0001  |
| 2,0  | 3,1e | 2139.493 | 2139.493 | 0.0000  |
| 3,0  | 4,1e | 2139.347 | 2139.347 | -0.0001 |
| 4,0  | 5,1e | 2139.207 | 2139.207 | 0.0000  |
| 5,0  | 6,1e | 2139.075 | 2139.075 | 0.0000  |
| 6,0  | 7,1e | 2138.951 | 2138.951 | 0.0000  |
| 2,0  | 1,1e | 2140.263 | 2140.263 | -0.0001 |
| 3,0  | 2,1e | 2140.415 | 2140.415 | -0.0001 |
| 4,0  | 3,1e | 2140.567 | 2140.567 | 0.0000  |
| 5,0  | 4,1e | 2140.721 | 2140.721 | 0.0001  |
| 6,0  | 5,1e | 2140.876 | 2140.876 | 0.0000  |
| 7,0  | 6,1e | 2141.036 | 2141.036 | 0.0000  |
|      |      |          |          |         |
| 1,0' | 0,0  | 2151.963 | 2151.963 | 0.0000  |
| 2,0' | 1,0  | 2152.087 | 2152.087 | 0.0000  |
| 3,0' | 2,0  | 2152.193 | 2152.193 | 0.0000  |
| 4,0' | 3,0  | 2152.281 | 2152.281 | 0.0000  |
| 5,0' | 4,0  | 2152.349 | 2152.349 | -0.0008 |
| 6,0' | 5,0  | 2152.381 | 2152.381 | 0.0008  |
| 0,0' | 1,0  | 2151.669 | 2151.669 | 0.0000  |
| 1,0' | 2,0  | 2151.501 | 2151.501 | 0.0000  |
| 2,0' | 3,0  | 2151.318 | 2151.318 | 0.0000  |
| 3,0' | 4,0  | 2151.120 | 2151.120 | 0.0000  |
| 4,0' | 5,0  | 2150.907 | 2150.907 | 0.0000  |

|      |      |          |          |         |
|------|------|----------|----------|---------|
| 5,0' | 6,0  | 2150.680 | 2150.680 | 0.0004  |
| 6,0' | 7,0  | 2150.420 | 2150.420 | -0.0006 |
|      |      |          |          |         |
| 2,2e | 1,1e | 2149.827 | 2149.827 | -0.0005 |
| 3,2e | 2,1e | 2149.969 | 2149.969 | -0.0001 |
| 4,2e | 3,1e | 2150.104 | 2150.104 | -0.0002 |
| 5,2e | 4,1e | 2150.213 | 2150.213 | -0.0001 |
| 6,2e | 5,1e | 2150.367 | 2150.371 | -0.0035 |
| 2,2f | 1,1f | 2149.820 | 2149.820 | 0.0002  |
| 3,2f | 2,1f | 2149.948 | 2149.948 | 0.0002  |
| 4,2f | 3,1f | 2150.064 | 2150.064 | 0.0002  |
| 5,2f | 4,1f | 2150.169 | 2150.169 | 0.0002  |
| 6,2f | 5,1f | 2150.261 | 2150.262 | -0.0001 |
| 2,2e | 2,1f | 2149.498 | 2149.497 | 0.0005  |
| 3,2e | 3,1f | 2149.466 | 2149.466 | 0.0001  |
| 4,2e | 4,1f | 2149.422 | 2149.422 | 0.0002  |
| 5,2e | 5,1f | 2149.345 | 2149.345 | -0.0004 |
| 2,2f | 2,1e | 2149.517 | 2149.517 | -0.0002 |
| 3,2f | 3,1e | 2149.508 | 2149.509 | -0.0002 |
| 4,2f | 4,1e | 2149.499 | 2149.499 | -0.0002 |
| 5,2f | 5,1e | 2149.491 | 2149.491 | -0.0002 |
| 6,2f | 6,1e | 2149.484 | 2149.484 | 0.0001  |
|      |      |          |          |         |
| 5,2e | 4,0  | 2152.949 | 2152.949 | 0.0002  |
| 6,2e | 5,0  | 2153.094 | 2153.098 | -0.0038 |
| 5,2e | 6,0  | 2151.280 | 2151.279 | 0.0003  |
|      |      |          |          |         |
| 1,0" | 0,0  | 2152.871 | 2152.870 | 0.0001  |
| 2,0" | 1,0  | 2152.910 | 2152.910 | 0.0000  |
| 3,0" | 2,0  | 2152.939 | 2152.939 | 0.0000  |
| 4,0" | 3,0  | 2152.969 | 2152.969 | -0.0001 |
| 5,0" | 4,0  | 2153.031 | 2153.031 | -0.0002 |
| 6,0" | 5,0  | 2153.003 | 2153.003 | 0.0000  |
| 0,0" | 1,0  | 2152.640 | 2152.640 | 0.0000  |
| 1,0" | 2,0  | 2152.408 | 2152.408 | -0.0001 |
| 2,0" | 3,0  | 2152.141 | 2152.141 | 0.0000  |
| 3,0" | 4,0  | 2151.865 | 2151.865 | 0.0000  |
| 4,0" | 5,0  | 2151.595 | 2151.595 | 0.0001  |
| 5,0" | 6,0  | 2151.362 | 2151.362 | 0.0005  |
| 6,0" | 7,0  | 2151.043 | 2151.043 | 0.0000  |
|      |      |          |          |         |

|      |      |          |          |         |
|------|------|----------|----------|---------|
| 4,0" | 3,1e | 2150.228 | 2150.229 | -0.0005 |
| 5,0" | 4,1e | 2150.295 | 2940.295 | -0.0003 |
| 6,0" | 5,1e | 2150.278 | 2150.276 | 0.0017  |
| 5,0" | 5,1f | 2149.427 | 2149.427 | -0.0003 |
| 6,0" | 6,1f | 2149.219 | 2149.219 | -0.0001 |

Table A-2. Observed transitions of CO-O<sub>2</sub> in group 2, correlating with ( $n(\text{O}_2) = 1, j(\text{O}_2) = 2$ ) (units of cm<sup>-1</sup>). Note: The "calculated" positions correspond to the "experimental" energy levels from Table 2 of the paper.

| Upper<br><i>J, K e/f</i> | Lower<br><i>J, K e/f</i> | Observed | Calculated | Obs - Calc |
|--------------------------|--------------------------|----------|------------|------------|
| 3,3e                     | 2,2e                     | 2145.741 | 2145.741   | -0.0002    |
| 4,3e                     | 3,2e                     | 2145.891 | 2145.892   | -0.0011    |
| 5,3e                     | 4,2e                     | 2146.042 | 2146.043   | -0.0007    |
| 6,3e                     | 5,2e                     | 2146.196 | 2146.193   | 0.0027     |
| 3,3f                     | 2,2f                     | 2145.741 | 2145.741   | -0.0002    |
| 4,3f                     | 3,2f                     | 2145.894 | 2145.894   | 0.0007     |
| 5,3f                     | 4,2f                     | 2146.051 | 2146.050   | 0.0010     |
| 6,3f                     | 5,2f                     | 2146.212 | 2146.214   | -0.0023    |
| 3,3e                     | 3,2f                     | 2145.303 | 2145.303   | 0.0003     |
| 4,3e                     | 4,2f                     | 2145.309 | 2145.309   | -0.0002    |
| 5,3e                     | 5,2f                     | 2145.319 | 2145.319   | -0.0002    |
| 3,3f                     | 3,2e                     | 2145.299 | 2145.298   | 0.0007     |
| 4,3f                     | 4,2e                     | 2145.296 | 2145.295   | 0.0002     |
| 5,3f                     | 5,2e                     | 2145.288 | 2145.288   | -0.0005    |
|                          |                          |          |            |            |
| 3,2e                     | 2,2e                     | 2143.136 | 2143.137   | -0.0004    |
| 4,2e                     | 3,2e                     | 2143.289 | 2143.289   | 0.0004     |
| 5,2e                     | 4,2e                     | 2143.447 | 2143.446   | 0.0012     |
| 6,2e                     | 5,2e                     | 2143.607 | 2143.608   | -0.0007    |
| 3,2f                     | 2,2f                     | 2143.132 | 2143.134   | -0.0014    |
| 4,2f                     | 3,2f                     | 2143.281 | 2143.281   | 0.0000     |
| 5,2f                     | 4,2f                     | 2143.431 | 2143.430   | 0.0011     |
| 6,2f                     | 5,2f                     | 2143.579 | 2143.580   | -0.0005    |
| 2,2e                     | 3,2e                     | 2142.253 | 2142.252   | 0.0006     |
| 3,2e                     | 4,2e                     | 2142.100 | 2142.100   | -0.0003    |
| 4,2e                     | 5,2e                     | 2141.943 | 2141.944   | -0.0005    |
| 5,2e                     | 6,2e                     | 2141.782 | 2141.782   | 0.0003     |
| 2,2f                     | 3,2f                     | 2142.256 | 2142.255   | 0.0009     |

|      |      |          |          |         |
|------|------|----------|----------|---------|
| 3,2f | 4,2f | 2142.108 | 2142.107 | 0.0001  |
| 4,2f | 5,2f | 2141.958 | 2141.959 | -0.0012 |
| 5,2f | 6,2f | 2141.811 | 2141.810 | 0.0005  |
|      |      |          |          |         |
| 2,2e | 3,3e | 2139.629 | 2139.629 | 0.0003  |
| 3,2e | 4,3e | 2139.481 | 2139.480 | 0.0008  |
| 4,2e | 5,3e | 2139.333 | 2139.332 | 0.0003  |
| 5,2e | 6,3e | 2139.185 | 2139.186 | -0.0018 |
| 2,2f | 3,3f | 2139.629 | 2139.628 | 0.0004  |
| 3,2f | 4,3f | 2139.478 | 2139.479 | -0.0008 |
| 4,2f | 5,3f | 2139.324 | 2139.325 | -0.0012 |
| 5,2f | 6,3f | 2139.168 | 2139.166 | 0.0025  |
| 3,2f | 3,3e | 2140.067 | 2140.067 | -0.0004 |
| 4,2f | 4,3e | 2140.064 | 2140.064 | 0.0000  |
| 5,2f | 5,3e | 2140.057 | 2140.057 | 0.0003  |
| 3,2e | 3,3f | 2140.071 | 2140.072 | -0.0004 |
| 4,2e | 4,3f | 2140.077 | 2140.077 | 0.0002  |
|      |      |          |          |         |
| 1,1e | 2,2e | 2145.512 | 2145.510 | 0.0014  |
| 2,1e | 3,2e | 2145.360 | 2145.360 | -0.0002 |
| 3,1e | 4,2e | 2145.203 | 2145.203 | -0.0001 |
| 4,1e | 5,2e | 2145.041 | 2145.035 | 0.0062  |
| 1,1f | 2,2f | 2145.516 | 2145.516 | 0.0000  |
| 2,1f | 3,2f | 2145.376 | 2145.379 | -0.0022 |
| 3,1f | 4,2f | 2145.245 | 2145.244 | 0.0011  |
| 4,1f | 5,2f | 2145.115 | 2145.110 | 0.0051  |
| 3,1e | 2,2e | 2146.240 | 2146.240 | 0.0002  |
| 4,1e | 3,2e | 2146.387 | 2146.380 | 0.0069  |
| 3,1f | 2,2f | 2146.269 | 2146.270 | -0.0008 |
| 4,1f | 3,2f | 2146.439 | 2146.432 | 0.0067  |
|      |      |          |          |         |
| 2,2e | 1,1e | 2139.859 | 2139.859 | -0.0003 |
| 3,2e | 2,1e | 2140.011 | 2140.011 | 0.0006  |
| 4,2e | 3,1e | 2140.169 | 2140.169 | -0.0002 |
| 2,2f | 1,1f | 2139.853 | 2139.854 | -0.0007 |
| 3,2f | 2,1f | 2139.995 | 2139.993 | 0.0022  |
| 4,2f | 3,1f | 2140.128 | 2140.130 | -0.0023 |
| 5,2f | 4,1f | 2140.268 | 2140.267 | 0.0008  |
| 2,2f | 2,1e | 2139.569 | 2139.567 | 0.0016  |
| 2,2e | 3,1e | 2139.132 | 2139.132 | -0.0003 |
| 3,2e | 4,1e | 2138.985 | 2138.994 | -0.0087 |

|       |      |          |          |         |
|-------|------|----------|----------|---------|
| 2,2f  | 3,1f | 2139.103 | 2139.104 | -0.0006 |
|       |      |          |          |         |
| 4,4e  | 3,3e | 2149.849 | 2149.849 | 0.0004  |
| 5,4e  | 4,3e | 2149.979 | 2149.978 | 0.0010  |
| 6,4e  | 5,3e | 2150.104 | 2150.104 | 0.0007  |
| 7,4e  | 6,3e | 2150.224 | 2150.224 | 0.0000  |
| 8,4e  | 7,3e | 2150.341 | 2150.340 | 0.0014  |
| 4,4f  | 3,3f | 2149.849 | 2149.850 | -0.0005 |
| 5,4f  | 4,3f | 2149.979 | 2149.981 | -0.0012 |
| 6,4f  | 5,3f | 2150.109 | 2150.108 | 0.0015  |
| 7,4f  | 6,3f | 2150.228 | 2150.230 | -0.0021 |
| 8,4f  | 7,3f | 2150.345 | 2150.346 | -0.0008 |
| 4,4e  | 4,3f | 2149.261 | 2149.261 | 0.0002  |
| 5,4e  | 5,3f | 2149.239 | 2149.240 | -0.0011 |
| 6,4e  | 6,3f | 2149.219 | 2149.213 | 0.0061  |
| 4,4f  | 4,3e | 2149.261 | 2149.258 | 0.0024  |
| 5,4f  | 5,3e | 2149.236 | 2149.236 | 0.0006  |
|       |      |          |          |         |
| 2,2'e | 2,2f | 2152.490 | 2152.491 | -0.0006 |
| 3,2'e | 3,2f | 2152.503 | 2152.502 | 0.0012  |
| 4,2'e | 4,2f | 2152.530 | 2152.529 | 0.0007  |
| 2,2'f | 2,2e | 2152.483 | 2152.483 | -0.0002 |
| 3,2'f | 3,2e | 2152.469 | 2152.470 | -0.0012 |
| 4,2'f | 4,2e | 2152.442 | 2152.443 | -0.0001 |
| 2,2'e | 3,2e | 2152.047 | 2152.048 | -0.0007 |
| 3,2'e | 4,2e | 2151.904 | 2151.903 | 0.0006  |
| 4,2'e | 5,2e | 2151.766 | 2151.767 | -0.0010 |
| 2,2'f | 3,2f | 2152.046 | 2152.045 | 0.0015  |
| 3,2'f | 4,2f | 2151.887 | 2151.888 | -0.0006 |
| 4,2'f | 5,2f | 2151.719 | 2151.719 | 0.0001  |
| 4,2'e | 3,2e | 2153.112 | 2153.112 | -0.0002 |
| 4,2'f | 3,2f | 2153.041 | 2153.041 | 0.0006  |

Table A-3. Calculated energy levels of CO-O<sub>2</sub> (in cm<sup>-1</sup>) with  $J = 0$  to 5, relative to the zero point energy (ZPE) of -81.9332 cm<sup>-1</sup>. This ZPE corresponds to the forbidden level with  $J = 0$ ,  $K = 0$ ,  $n(\text{O}_2) = 0$ . Stack labels A, B, C, etc. correspond to those of Tables 5 and 6 in the paper. Permutation inversion group symmetry and spectroscopy parity  $ef$  are also indicated. Only the allowed B<sup>+</sup> and B<sup>-</sup> levels are given.

| $J = 0, B^+(e)$ |     |       | $J = 0, B^-(f)$ |     |       |
|-----------------|-----|-------|-----------------|-----|-------|
| calc            | $K$ | stack | calc            | $K$ | stack |
| 4.6342          | 0   | C     | 4.4928          | 0   | B     |
| 8.3172          | 0   | E     | 16.7199         | 0   |       |
| 16.2495         | 0   |       |                 |     |       |

  

| $J = 1, B^+(f)$ |     |       | $J = 1, B^-(e)$ |       |       |
|-----------------|-----|-------|-----------------|-------|-------|
| calc            | $K$ | stack | calc            | $K$   | stack |
| 1.8396          | 1   | A     | 1.8322          | 1     | A     |
| 4.6507          | 0   | B     | 4.7915          | 0     | C     |
| 9.6674          | 1   | F     | 8.4632          | 0     | E     |
| 11.6413         | 1   | G     | 9.6652          | 1     | F     |
| 11.8904         | 1   | I     | 11.6342         | 1     | G     |
| 16.3491         | 1   |       | 11.8904         | 1     | I     |
| 16.9134         | 0   |       | 16.2400         | 1 + 0 |       |
|                 |     |       | 16.5291         | 0 + 1 |       |

  

| $J = 2, B^+(e)$ |       |       | $J = 2, B^-(f)$ |     |       |
|-----------------|-------|-------|-----------------|-----|-------|
| calc            | $K$   | stack | calc            | $K$ | stack |
| 2.1410          | 1     | A     | 2.1634          | 1   | A     |
| 4.8824          | 2     | D     | 4.8841          | 2   | D     |
| 5.1076          | 0     | C     | 4.9665          | 0   | B     |
| 8.7552          | 0     | E     | 9.9743          | 1   | F     |
| 9.9676          | 1     | F     | 11.9416         | 1   | G     |
| 11.9207         | 1     | G     | 12.1993         | 1   | I     |
| 12.1989         | 1     | I     | 15.4010         | 2   | K     |
| 15.3988         | 2     | K     | 16.5891         | 1   |       |
| 16.4259         | 1 + 0 |       | 17.2837         | 0   |       |
| 16.9096         | 0 + 1 |       | 17.6192         | 2   |       |
| 17.6191         | 2     |       | 18.5848         | 2   |       |
| 18.5843         | 2     |       |                 |     |       |

| $J = 3, B^+(f)$ |     |       | $J = 3, B^-(e)$ |       |       |
|-----------------|-----|-------|-----------------|-------|-------|
| calc            | $K$ | stack | calc            | $K$   | stack |
| 2.6489          | 1   | A     | 2.6040          | 1     | A     |
| 5.3533          | 2   | D     | 5.3455          | 2     | D     |
| 5.4400          | 0   | B     | 5.5853          | 0     | C     |
| 10.4344         | 1   | F     | 9.1930          | 0     | E     |
| 12.0063         | 3   | H     | 10.4206         | 1     | F     |
| 12.3920         | 1   | G     | 12.0062         | 3     | H     |
| 12.6631         | 1   | I     | 12.3514         | 1     | G     |
| 14.8465         | 3   | J     | 12.6617         | 1     | I     |
| 15.8341         | 2   | K     | 14.8465         | 3     | J     |
| 16.9714         | 1   |       | 15.8232         | 2     | K     |
| 17.8147         | 0   |       | 16.7708         | 1 + 0 |       |
| 18.0735         | 2   |       | 17.4179         | 0 + 1 |       |

| $J = 4, B^+(e)$ |       |       | $J = 4, B^-(f)$ |     |       |
|-----------------|-------|-------|-----------------|-----|-------|
| calc            | $K$   | stack | calc            | $K$ | stack |
| 3.2210          | 1     | A     | 3.2958          | 1   | A     |
| 5.9565          | 2     | D     | 5.9784          | 2   | D     |
| 6.2278          | 0     | C     | 6.0709          | 0   | B     |
| 9.7765          | 0     | E     | 11.0475         | 1   | F     |
| 11.0238         | 1     | F     | 12.6075         | 3   | H     |
| 12.6066         | 3     | H     | 12.9924         | 1   | G     |
| 12.9277         | 1     | G     | 13.2825         | 1   | I     |
| 13.2787         | 1     | I     | 15.4392         | 3   | J     |
| 15.4386         | 3     | J     | 16.4092         | 2   | K     |
| 16.3772         | 2     | K     | 17.5035         | 1   |       |
| 17.2811         | 1 + 0 |       | 18.4947         | 0   |       |
| 18.0481         | 0 + 1 |       | 18.0718         | 4   |       |



| $J = 5, B^+(f)$ |     |       | $J = 5, B^-(e)$ |       |       |
|-----------------|-----|-------|-----------------|-------|-------|
| calc            | $K$ | stack | calc            | $K$   | stack |
| 4.1037          | 1   | A     | 3.9914          | 1     | A     |
| 6.7588          | 2   | D     | 6.7128          | 2     | D     |
| 6.8588          | 0   | B     | 7.0367          | 0     | C     |
| 11.8129         | 1   | F     | 10.5055         | 0     | E     |
| 13.3553         | 3   | H     | 11.7761         | 1     | F     |
| 13.7425         | 1   | G     | 13.3518         | 3     | H     |
| 14.0577         | 1   | I     | 13.6515         | 1     | G     |
| 16.1796         | 3   | J     | 14.0498         | 1     | I     |
| 17.1249         | 2   | K     | 16.1770         | 3     | J     |
| 18.1882         | 1   |       | 17.0549         | 2     | K     |
| 18.8435         | 4   |       | 17.9622         | 1 + 0 |       |
| 19.3113         | 0   |       | 18.7969         | 0 + 1 |       |
| 19.4490         | 2   |       | 18.8535         | 4     |       |
